# Supplementary material for: Paracetamol Intake and Hematologic Malignancies: A Meta-Analysis of Observational Studies
Source: MDPI journal article supplement (doi:10.3390/jcm10112429), 2021-05-30
Supplement: s1 [file s1]

# Paracetamol intake and hematologic malignancies: A meta-analysis of observational studies.

Jesús Prego-Domínguez <sup>1</sup> and Bahi Takkouche <sup>1,2,\*</sup>

<sup>1</sup> Department of Preventive Medicine, University of Santiago de Compostela, 15782 Santiago de Compostela, Spain; susofis@gmail.com (J.P.D.); bahi.takkouche@usc.es (B.T.)

<sup>2</sup> Centro de Investigación Biomédica en Red de Epidemiología y Salud Pública (CIBER-ESP), 28029 Madrid, Spain

\* Correspondence: [bahi.takkouche@usc.es](mailto:bahi.takkouche@usc.es); (B.T.) Tel.: +34-881-812268; Fax: +34-981-572282

**Table S1.** Quality assessment of the studies included in the meta-analysis.

|                 |      |              | CRITERIA <sup>#</sup> / SCORE <sup>*</sup> |   |   |   |   |             |           |
|-----------------|------|--------------|--------------------------------------------|---|---|---|---|-------------|-----------|
| Author          | Year | Design       | 1                                          | 2 | 3 | 4 | 5 | Total score |           |
| Friedman et al. | 1981 | Case-control | 0                                          | 0 | 0 | 0 | 0 | 0           | High risk |
| Kato et al.     | 2002 | Case-control | 0                                          | 1 | 1 | 0 | 1 | 3           |           |
| Friis et al.    | 2002 | Cohorts      | 1                                          | 1 | 1 | 0 | 0 | 3           |           |
| Baker et al.    | 2005 | Case-control | 0                                          | 1 | 0 | 1 | 1 | 3           |           |
| Weiss et al.    | 2006 | Case-control | 0                                          | 1 | 0 | 1 | 1 | 3           |           |
| Moysich et al.  | 2007 | Case-control | 0                                          | 1 | 0 | 1 | 1 | 3           |           |
| Becker et al.   | 2009 | Case-control | 0                                          | 1 | 0 | 0 | 0 | 1           |           |
| Ross et al.     | 2011 | Case-control | 0                                          | 1 | 1 | 0 | 1 | 3           | Low risk  |
| Lipworth et al. | 2003 | Cohorts      | 1                                          | 1 | 1 | 0 | 1 | 4           |           |
| Chang et al.    | 2004 | Case-control | 0                                          | 1 | 1 | 1 | 1 | 4           |           |
| Walter et al.   | 2011 | Cohorts      | 1                                          | 1 | 0 | 1 | 1 | 4           |           |

**# Scoring criteria:** 1) Participation in both groups > 80%; 2) Incident cases (case-control) / Changes of exposure accurately measured (cohorts); 3) Population controls (case-control) / loss of follow-up < 20% (cohorts); 4) Adjustment for sex, age and smoking or the distribution of these factors was similar between index and comparison group; 5) Duration of exposure accurately measured. **\* Scoring method:** 0= no or not given, 1=yes; Score ≥ 4: low risk of bias, score < 4: high risk of bias.
